# Supplementary material for: Non-photobleaching YAG:Ce nanoparticles for optical imaging with blue excitation
Source: Royal Society of Chemistry journal article supplement (doi:10.1039/c2ra01283a), 2012-01-01
Supplement: c2ra01283a.pdf [file c2ra01283a.pdf]

## Supporting Information

### S1. XRD patterns of YAG samples with different reaction time, different solvents and different al

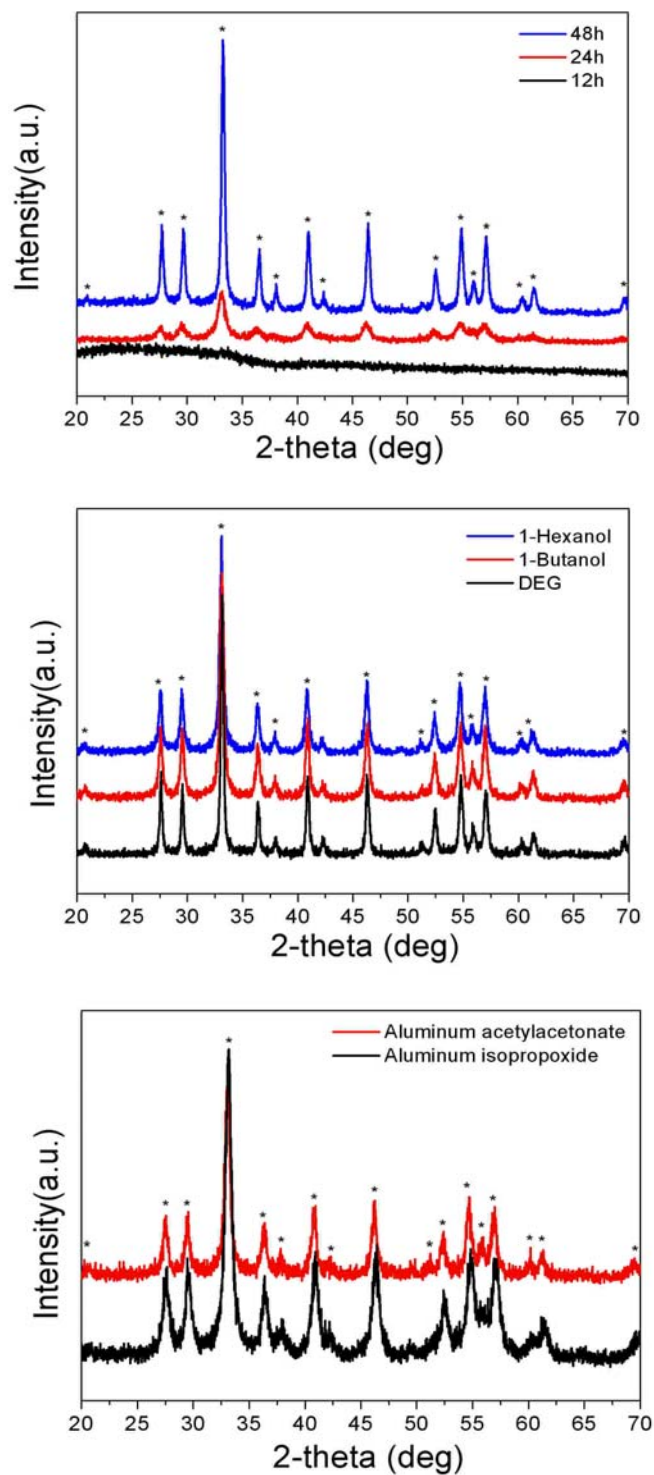

Figure S1: XRD patterns of YAG samples with different reaction time, different solvents and different aluminum source.

## S2. EDX measurements of YAG:Ce1% and YAG:Ce6% samples.

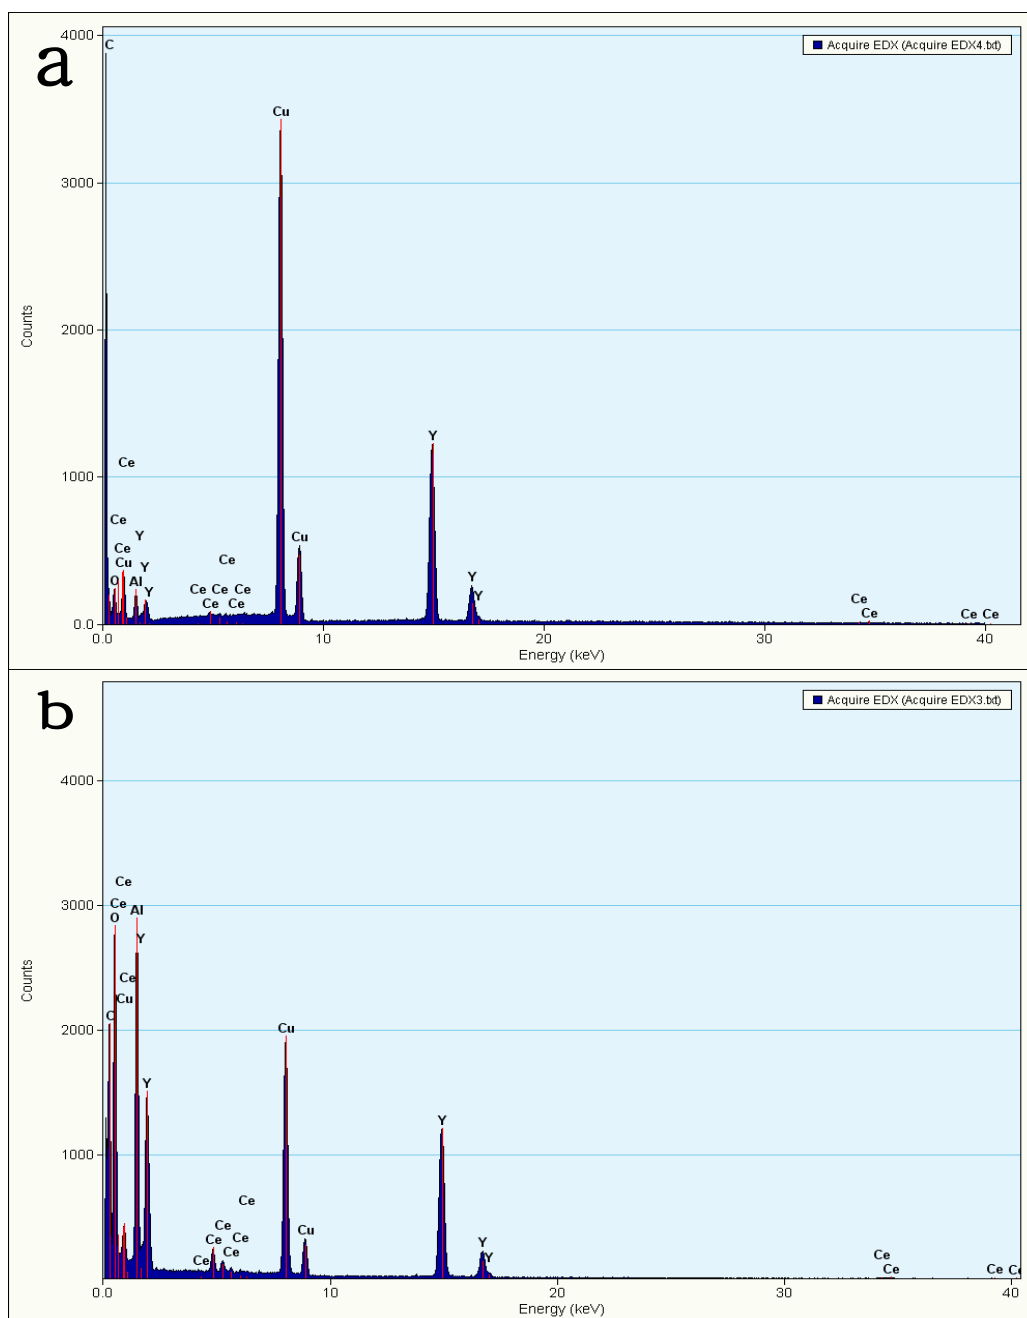

Figure S2: EDX spectra of YAG:Ce1%(a) and YAG:Ce6%(b) nanoparticles.

**S3. FTIR patterns of YAG samples obtained with a substitution of DEG by 1-hexanol and 1-butanol.** When DEG was replaced by 1-hexanol and 1-butanol, the YAG can also be formed and no variation can be observed in the FTIR spectrum. The results indicate that the 1,4-BD plays an important role in the crystal formation.

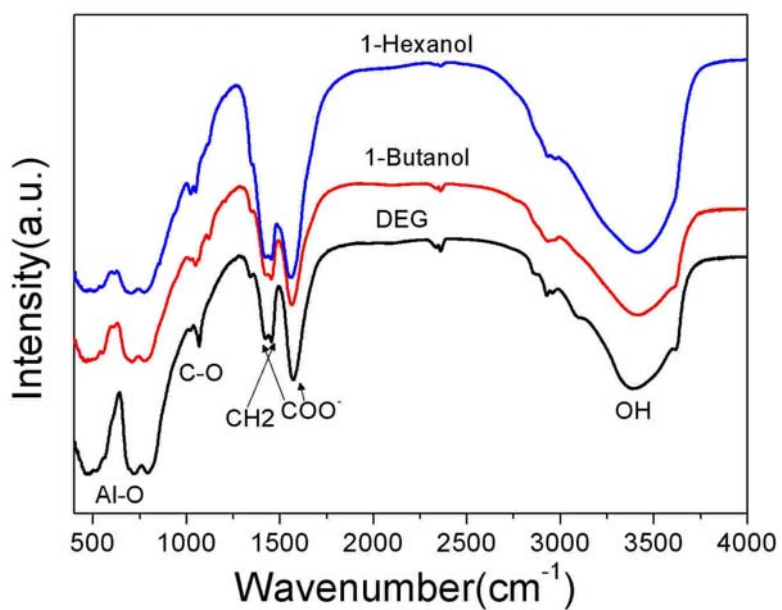

Figure S3: FTIR spectra of YAG samples obtained with solvents.

**S4. The irradiation stability of the YAG:Ce(1%) colloids.** Under irradiation of 450nm for 80 minutes, no intensity variation can be observed in this period.

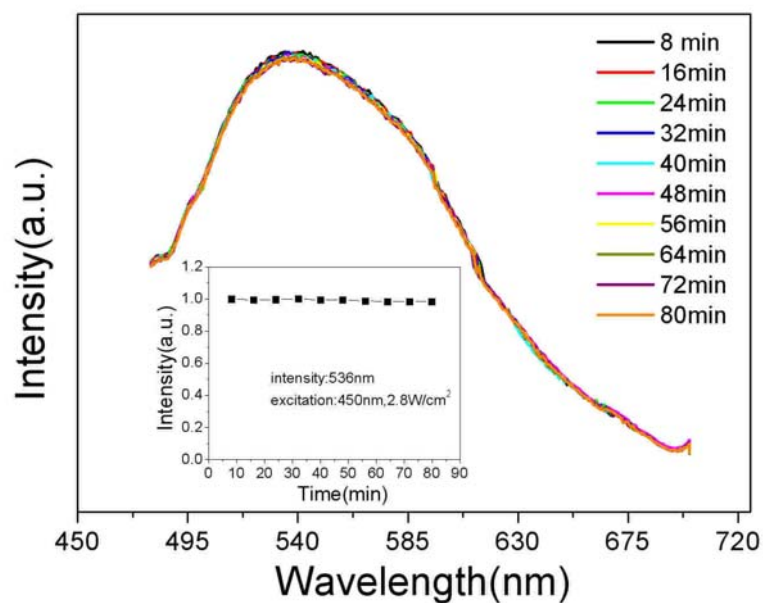

Figure S4. The irradiation stability of the YAG:Ce(1%) colloids dispersed in water with a concentration of 2.5mg/ml. The excitation position is 450nm with a power density of 28 mW/cm<sup>2</sup> from xenon lamp and the whole time was 8 minutes. Inset: The corresponding intensity of the emissions monitoring 536nm in this measuring period.

**S5 BC-37 cell imaging.** The imaging function of these NPs were also confirmed with another cancerous cell BC-37, which indicates the non-specific imaging property of the YAG:Ce NPs.

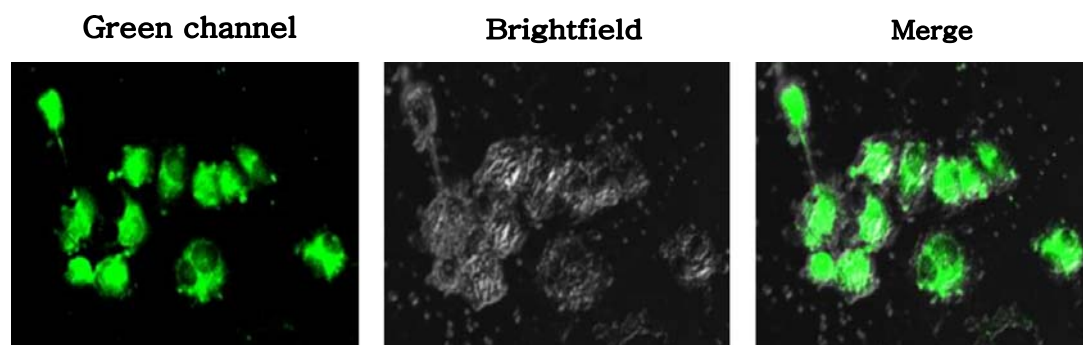

Figure S5. Confocal, bright field, and superimposed images of live BCap-37 cells labeled with YAG:Ce NPs. The images are false colored.
